# Supplementary material for: Enhancing the combustion of nAl with AlF3 coating: gas–solid reaction mechanism for reducing combustion agglomeration of Al powder
Source: Royal Society of Chemistry journal article supplement (doi:10.1039/d3cp06133g), 2024-01-01
Supplement: d3cp06133g1.pdf [file d3cp06133g1.pdf]

## Enhancing the combustion of nAl with AlF<sub>3</sub> coating: gas-solid reaction mechanism for reducing combustion agglomeration of Al powder

Chen Shen<sup>1,2</sup>, Shi Yan<sup>1,\*</sup>, Jie Yao<sup>1</sup>, Hui Ren<sup>1</sup>, Xueyong Guo<sup>1</sup>, Jianxin Nie<sup>1</sup>, Yapeng Ou<sup>1</sup>, Qingjie Jiao<sup>1</sup>, Yunjun Luo<sup>2</sup>

<sup>1</sup> State Key Laboratory of Explosion of Science and Technology, Beijing Institute of Technology, Beijing 100081, China

<sup>2</sup> School of Materials Science & Engineering, Beijing Institute of Technology, Beijing 100081, China

Correspondence to: [bityanshi@126.com](mailto:bityanshi@126.com) (Shi Yan)

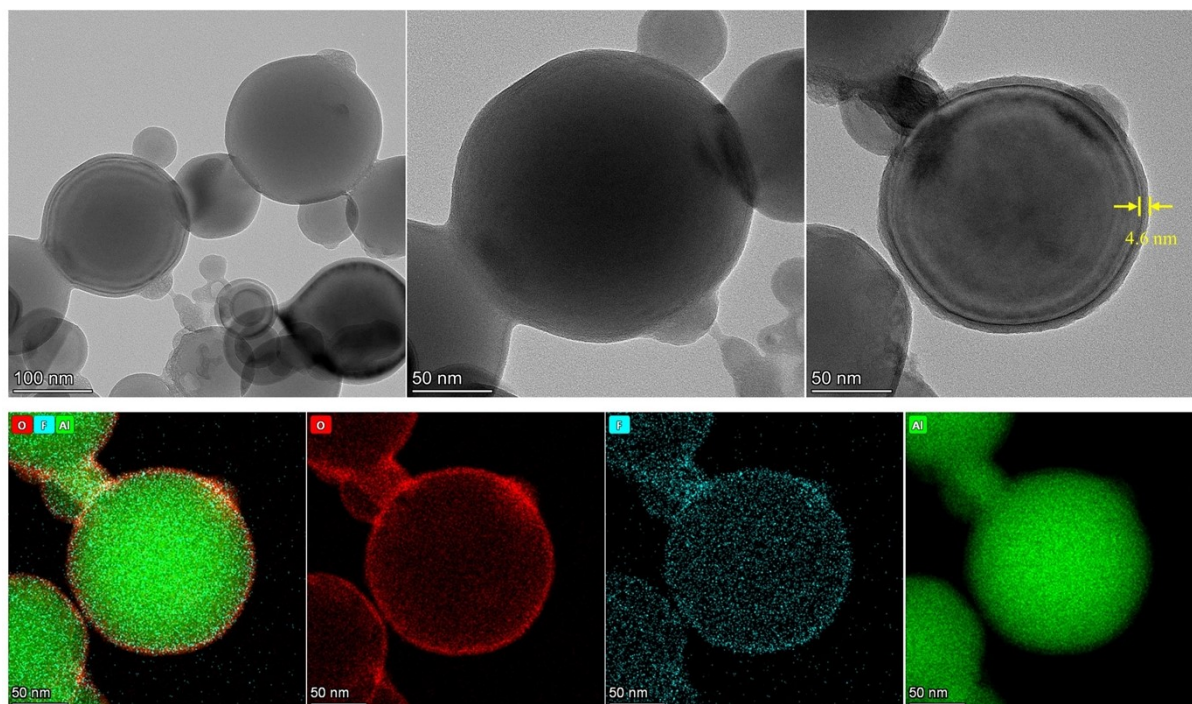

Fig. S1. TEM and EDS images of nAl@AlF<sub>3</sub>-1.

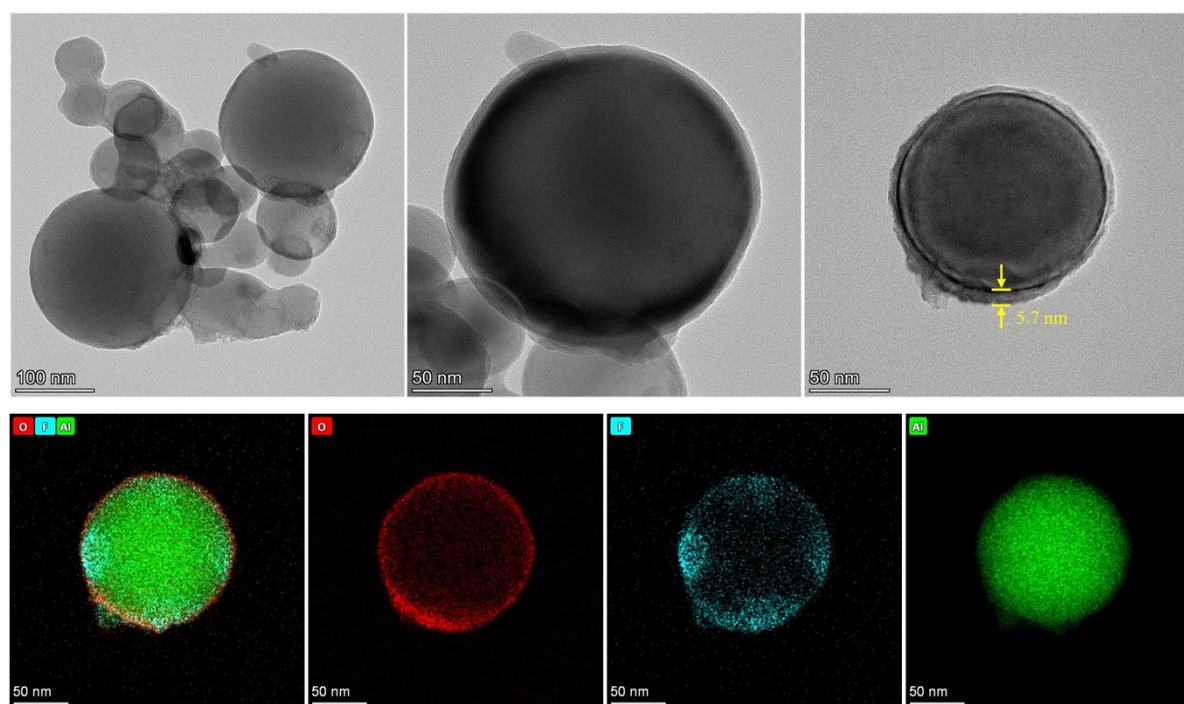

Fig. S2. TEM and EDS images of nAl@AlF<sub>3</sub>-3.

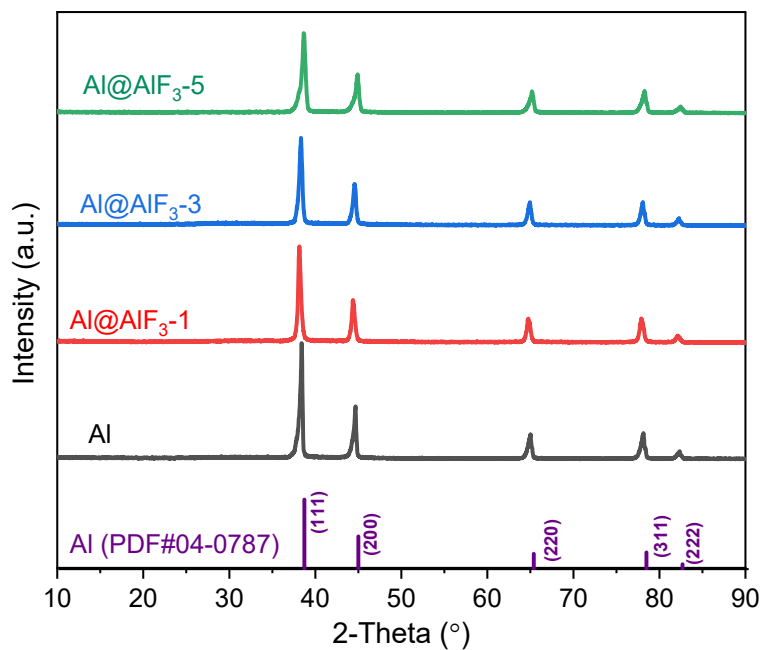

Fig. S3. XRD patterns of raw nAl and three types nAl@AlF<sub>3</sub> samples.

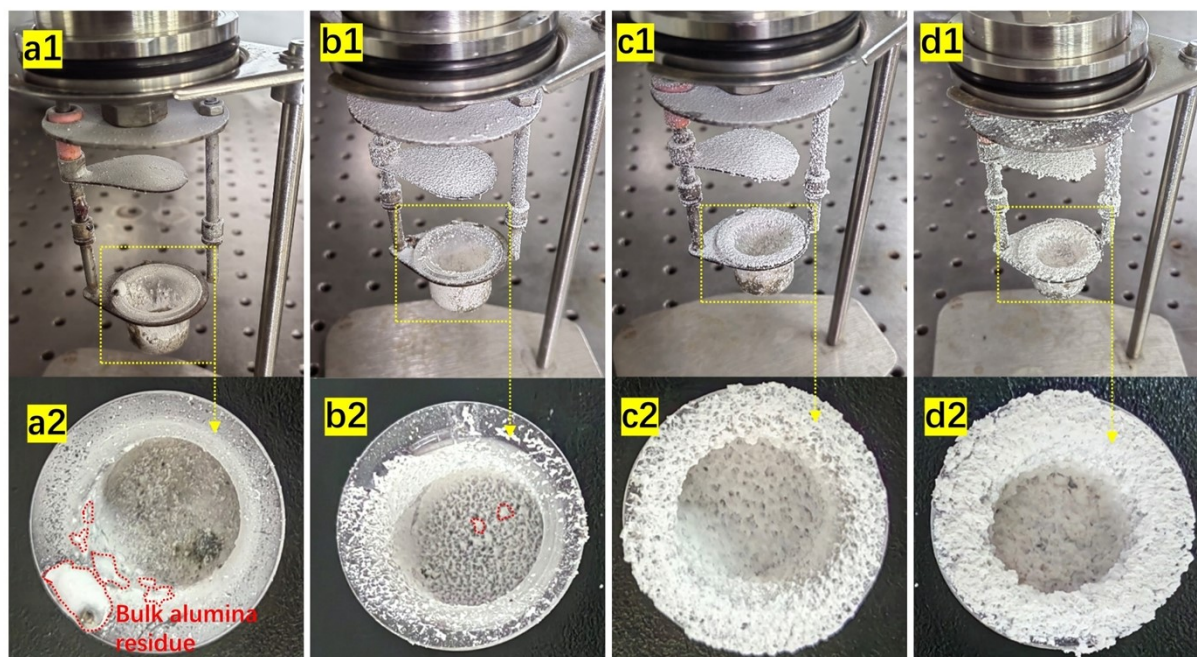

Fig. S4. The macroscopic morphology of the residues after oxygen bomb testing, left to right is nAl, nAl@AlF<sub>3</sub>-1, nAl@AlF<sub>3</sub>-3, nAl@AlF<sub>3</sub>-5, respectively.

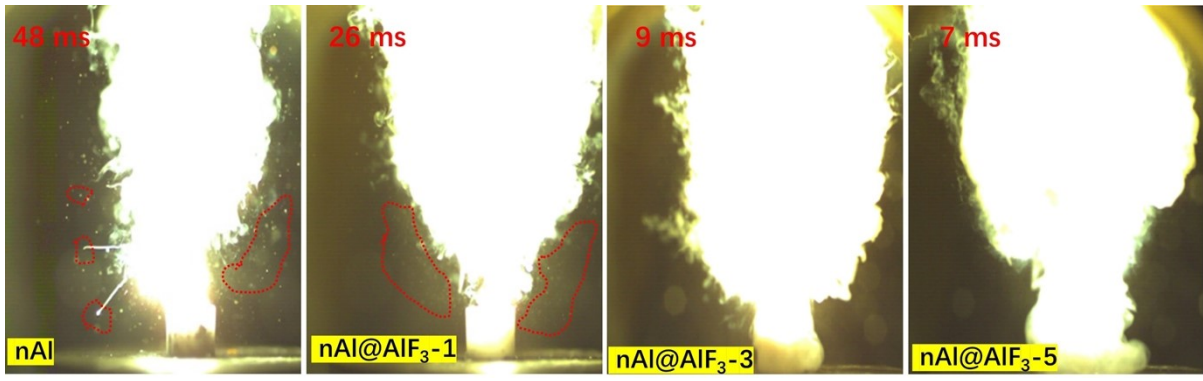

Fig. S5. High resolution image of typical flames in stability stage.
